# Supplementary material for: Two titanium(iv)-oxo-clusters: synthesis, structures, characterization and recycling catalytic activity in the oxygenation of sulfides
Source: Royal Society of Chemistry journal article supplement (doi:10.1039/c7dt02516e), 2017-01-01
Supplement: c7dt02516e1.pdf [file c7dt02516e1.pdf]

## *Electronic Supplementary Information*

### **Two Titanium(IV)-Oxo-Clusters: Synthesis, Structures, Characterization and Recycling Catalytic Activity in Oxygenation of Sulfide**

Rong-Hui Wu,<sup>a,b</sup> Ming Guo,<sup>b</sup> Ming-Xin Yu,<sup>a</sup> and Long-Guan Zhu<sup>\*a</sup>

*<sup>a</sup> Department of Chemistry, Zhejiang University, Hangzhou 310027, People's Republic of China.*

*<sup>b</sup> Key Laboratory of Chemical Utilization of Forestry Biomass of Zhejiang Province, Zhejiang A & F University, Lin'an, Zhejiang Province, 311300, China.*

E-mail: [chezlg@zju.edu.cn](mailto:chezlg@zju.edu.cn)

**Table S1 Selected bond lengths (Å) and angles (°) for TOC-1**

| Lengths          |            |                                               |            |
|------------------|------------|-----------------------------------------------|------------|
| Ti2-Ti1          | 3.397(2)   | Ti2-Ti3                                       | 3.340(2)   |
| Ti1-N1           | 2.273(8)   | Ti1-N2                                        | 2.202(8)   |
| Ti2-N3           | 2.235(7)   | Ti2-N4                                        | 2.242(8)   |
| Ti3-N5           | 2.254(7)   | Ti3-N6                                        | 2.232(7)   |
| Ti-( $\mu_2$ -O) |            | Ti- O(OR <sub>terminal</sub> )                |            |
| Ti1-O8           | 1.796(6)   | Ti1-O1                                        | 2.004(7)   |
| Ti2-O10          | 1.8327(17) | Ti- O(O <sub>2</sub> CR <sub>terminal</sub> ) |            |
| Ti2-O7           | 1.837(6)   | Ti1-O3                                        | 1.924(6)   |
| Ti2-O11          | 1.822(6)   | Ti-O(OH <sub>terminal</sub> )                 |            |
| Ti3-O13          | 1.824(2)   | Ti1-O7                                        | 1.807(6)   |
| Ti3-O8           | 1.839(6)   | Ti3-O12                                       | 2.092(6)   |
| Ti3-O11          | 1.825(6)   |                                               |            |
| Angles           |            |                                               |            |
| Ti1-O7-Ti2       | 137.6(4)   | Ti1-O8-Ti3_2                                  | 168.9(4)   |
| Ti2-O11-Ti3      | 132.6(3)   | Ti2-O10-Ti2_2                                 | 171.8(5)   |
| Ti3-O13-Ti3_2    | 155.0(5)   | O8-Ti1-O3                                     | 97.6(3)    |
| O8-Ti1-O7        | 99.5(3)    | O8-Ti1-O1                                     | 166.9(3)   |
| O7-Ti1-O3        | 103.1(3)   | O3-Ti1-O1                                     | 85.3(3)    |
| O7-Ti1-O1        | 92.2(3)    | O7-Ti1-N2                                     | 93.0(3)    |
| O8-Ti1-N2        | 90.0(3)    | O1-Ti1-N2                                     | 83.5(3)    |
| O3-Ti1-N2        | 160.8(3)   | O7-Ti1-N1                                     | 164.9(3)   |
| O8-Ti1-N1        | 88.1(3)    | O1-Ti1-N1                                     | 79.2(3)    |
| O3-Ti1-N1        | 88.6(3)    | O11-Ti2-O7                                    | 98.4(3)    |
| N2-Ti1-N1        | 73.9(3)    | O7-Ti2-O10                                    | 103.28(19) |
| O11-Ti2-O10      | 105.0(3)   | O7-Ti2-O9                                     | 164.5(2)   |
| O11-Ti2-O9       | 90.0(3)    | O11-Ti2-N3                                    | 89.1(3)    |
| O10-Ti2-O9       | 86.88(19)  | O10-Ti2-N3                                    | 158.5(3)   |
| O7-Ti2-N3        | 90.3(3)    | O11-Ti2-N4                                    | 161.2(3)   |
| O9-Ti2-N3        | 76.8(3)    | O10-Ti2-N4                                    | 91.0(3)    |
| O7-Ti2-N4        | 87.1(3)    | N3-Ti2-N4                                     | 72.9(3)    |
| O9-Ti2-N4        | 81.0(3)    | O13-Ti3-O8_1                                  | 100.5(2)   |
| O13-Ti3-O11      | 104.8(3)   | O13-Ti3-O12                                   | 93.0(2)    |
| O11-Ti3-O8_1     | 97.4(3)    | O8_1-Ti3-O12                                  | 163.3(3)   |
| O11-Ti3-O12      | 88.5(3)    | O11-Ti3-N6                                    | 163.3(3)   |
| O13-Ti3-N6       | 88.5(3)    | O12-Ti3-N6                                    | 80.7(3)    |
| O8_1-Ti3-N6      | 89.7(3)    | O11-Ti3-N5                                    | 92.3(3)    |
| O13-Ti3-N5       | 162.0(3)   | O12-Ti3-N5                                    | 81.8(3)    |
| O8_1-Ti3-N5      | 82.4(3)    | N6-Ti3-N5                                     | 73.6(3)    |

**Table S2 Selected bond lengths (Å) and angles (°) for TOC-2**

| Lengths          |          |                                               |          |
|------------------|----------|-----------------------------------------------|----------|
| Ti1-N1           | 2.278(6) | Ti1-N2                                        | 2.197(7) |
| Ti-( $\mu_2$ -O) |          | Ti- O(OR <sub>terminal</sub> )                |          |
| Ti1-O7           | 1.766(5) | Ti1-O3                                        | 1.874(5) |
| Ti1-O7_1         | 1.836(5) | Ti- O(O <sub>2</sub> CR <sub>terminal</sub> ) |          |
|                  |          | Ti1-O1                                        | 2.026(5) |
| Angles           |          |                                               |          |
| Ti1-O7-Ti1_2     | 161.3(3) | O7-Ti1-O7_1                                   | 100.0(3) |
| O7-Ti1-O3        | 105.8(3) | O7_1-Ti1-O3                                   | 94.4(2)  |
| O7-Ti1-O1        | 93.0(2)  | O7_1-Ti1-O1                                   | 166.5(2) |
| O3-Ti1-O1        | 85.3(2)  | O7-Ti1-N2                                     | 88.9(3)  |
| O7_1-Ti1-N2      | 90.0(3)  | O3-Ti1-N2                                     | 163.7(3) |
| O1-Ti1-N2        | 86.8(3)  | O7-Ti1-N1                                     | 161.8(3) |
| O7_1-Ti1-N1      | 82.9(2)  | O3-Ti1-N1                                     | 91.7(3)  |
| O1-Ti1-N1        | 83.7(2)  | N2-Ti1-N1                                     | 73.2(3)  |

**Table S3 BVS calculations for O atoms in TOCs 1-2 <sup>a</sup>**

| TOC-1              |              |          |       |        |              |          |        |
|--------------------|--------------|----------|-------|--------|--------------|----------|--------|
| u2-O/total valence | Bonded atoms | distance | BVS   | Aqua-O | Bonded atoms | distance | BVS    |
| O7/2.123           | Ti1          | 1.818    | 0.997 | O9     | Ti2          | 2.156    | 0.3979 |
|                    | Ti2          | 1.792    | 1.064 |        | O12          | Ti3      | 2.103  |
| O8_01/2.033        | Ti1          | 1.792    | 1.064 |        |              |          |        |
|                    | Ti3_01       | 1.827    | 0.969 |        |              |          |        |
| O11/1.966          | Ti2          | 1.818    | 0.997 |        |              |          |        |
|                    | Ti3          | 1.827    | 0.969 |        |              |          |        |
| O13/1.984          | Ti3          | 1.823    | 0.992 |        |              |          |        |
|                    | Ti-3         | 1.823    | 0.992 |        |              |          |        |
| TOC-2              |              |          |       |        |              |          |        |
| O7/1.976           | Ti1          | 1.771    | 0.984 |        |              |          |        |
|                    | Ti1_01       | 1.832    | 0.992 |        |              |          |        |

<sup>a</sup> Bond valence calculations were performed using Bond Valence Calculator (Version 2.0, February 1993), and default parameters provided by Bond Valence Calculator were used, i.e.,  $R_0 = 1.815$  and  $B = 0.370$ .

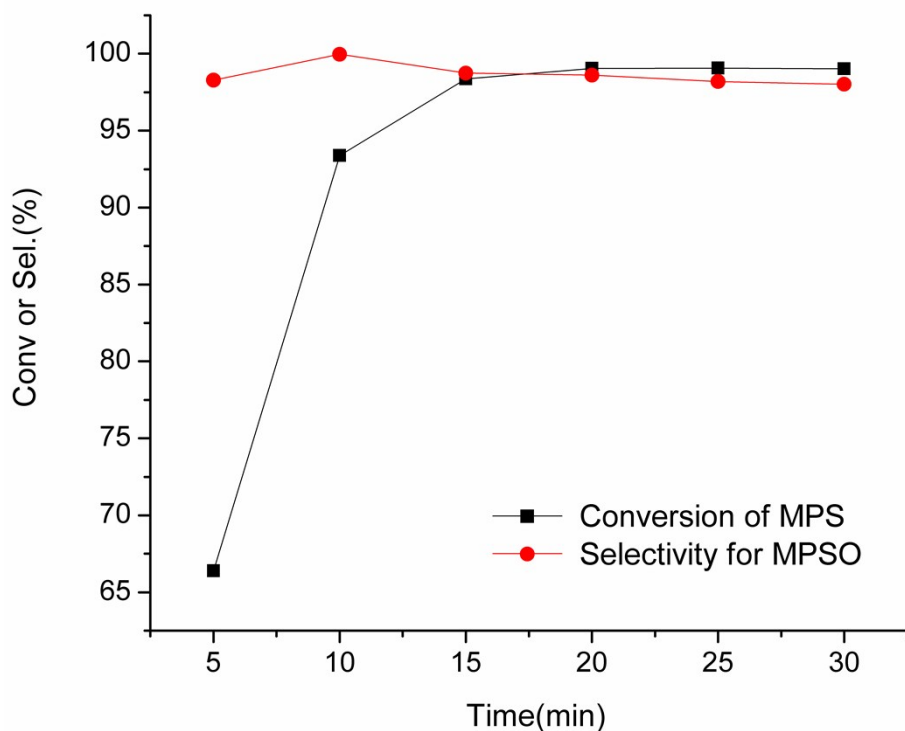

**Fig S1.** A time dependent profile of the oxidation of MPS by aqueous  $H_2O_2$  by TOC-1.

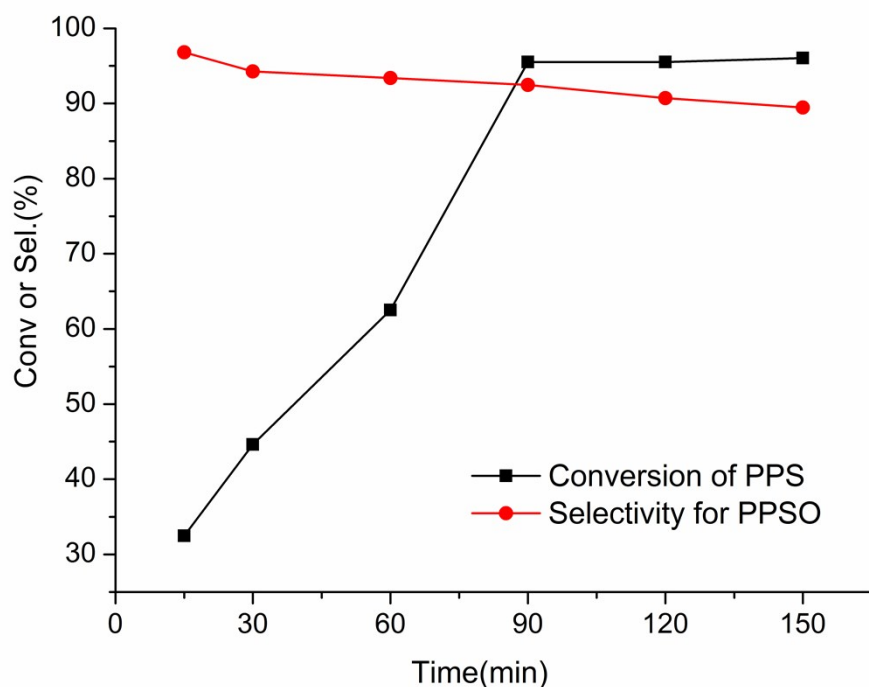

**Fig S2.** A time dependent profile of the oxidation of PPS by aqueous  $H_2O_2$  by TOC-1.

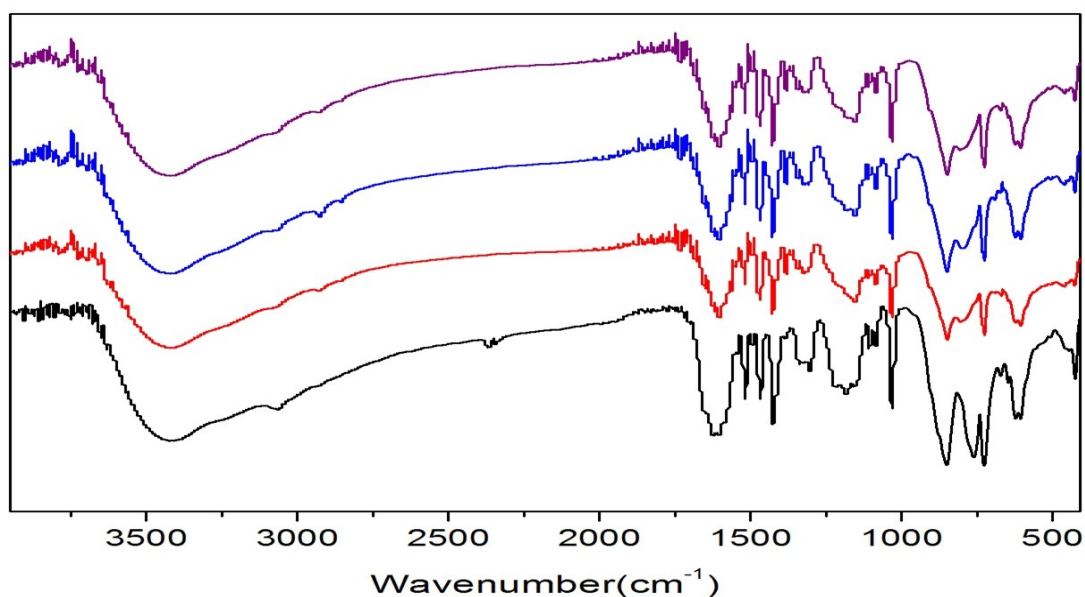

**Fig S3. The IR spectrum of three recycling runs for TOC-1. Black represent original IR spectrum, red, blue and purple represent IR spectrum after catalytic reaction one time, second time and fourth time.**

**Table S4 Crystallographic data and refinement parameters for TOCs 1-2.**

| TOC                                  | 1                                  | 2                                 |
|--------------------------------------|------------------------------------|-----------------------------------|
| Empirical formula                    | $C_{86}H_{110}N_{12}O_{49}Ti_6S_2$ | $C_{76}H_{96}N_{12}O_{46}Ti_4S_4$ |
| Mr                                   | 2446.96                            | 2232.96                           |
| Crystal system                       | monoclinic                         | trigonal                          |
| Space group                          | C 2/c                              | I-4                               |
| Size(mm <sup>3</sup> )               | 0.38×0.34×0.30                     | 0.40×0.40×0.32                    |
| habit/color                          | yellow/block                       | yellow/block                      |
| a(Å)                                 | 25.875(4)                          | 13.5404(3)                        |
| b(Å)                                 | 29.103(2)                          | 13.5404(3)                        |
| c(Å)                                 | 23.050(2)                          | 27.7844(10)                       |
| α(°)                                 | 90.00                              | 90.00                             |
| β(°)                                 | 121.355(8)                         | 90.00                             |
| γ(°)                                 | 90.00                              | 90.00                             |
| V(Å <sup>3</sup> )                   | 14823(3)                           | 5094(2)                           |
| Z                                    | 4                                  | 2                                 |
| D <sub>c</sub> (Mg·m <sup>-3</sup> ) | 0.895                              | 1.200                             |
| μ(mm <sup>-1</sup> )                 | 0.385                              | 0.453                             |
| θ range                              | 3.2-29.5                           | 3.0-29.4                          |
| Unique reflections                   | 17533                              | 6231                              |
| Observed reflections                 | 7839                               | 4586                              |
| parameters                           | 594                                | 271                               |
| F(000)                               | 4272                               | 1872                              |

---

|                                               |               |                |
|-----------------------------------------------|---------------|----------------|
| T(K)                                          | 170           | 293            |
| R <sub>1</sub> wR <sub>2</sub> [I>2σ(I)]      | 0.0982,0.2621 | 0.0540, 0.1664 |
| R <sub>1</sub> wR <sub>2</sub> [all data]     | 0.1631,0.2992 | 0.0726, 0.189  |
| GOF                                           | 0.947         | 0.703          |
| Largest peak and<br>hole(e· Å <sup>-3</sup> ) | 1.177, -1.123 | 0.29, -0.20    |

---
